# Supplementary material for: Unraveling mitotic protein networks by 3D multiplexed epitope drug screening
Source: PubMed Central journal article supplement (PMC6088390; doi:10.15252/msb.20188238), 2018-08-13
Supplement: MSB-14-e8238-s001.pdf [file MSB-14-e8238-s001.pdf]

## **Appendix for:**

### **Unraveling mitotic protein networks by 3D multiplexed epitope drug screening**

Lorenz Maier<sup>1,2,3,+</sup>, Stefan Kallenberger<sup>1,2,3,+</sup>, Katharina Jechow<sup>2</sup>, Marcel Waschow<sup>2</sup>, Roland Eils<sup>1,2,3\*</sup>, Christian Conrad<sup>1,2\*</sup>

#### **Table of contents**

|                                                                                 |          |
|---------------------------------------------------------------------------------|----------|
| <b>Appendix Figure S1 - Cell volumes, abundance and concentration changes.</b>  | <b>2</b> |
| <b>Appendix Figure S2 - Predicted localization affinities.</b>                  | <b>4</b> |
| <b>Appendix Figure S3 - Importance of affinity parameters for model fit.</b>    | <b>6</b> |
| <b>Appendix Figure S4 - Average mutual affinities of all inhibitor effects.</b> | <b>7</b> |
| <b>Appendix Figure S5 – Simple affinity model for two species.</b>              | <b>7</b> |
| <b>Appendix Figure S6 – Sequential forward selection of mutual affinities.</b>  | <b>8</b> |
| <b>Appendix Figure S7 - Results of multi-start local optimizations.</b>         | <b>8</b> |
| <b>Appendix Table S1 - Assay proteins, inhibitors and cell lines.</b>           | <b>9</b> |

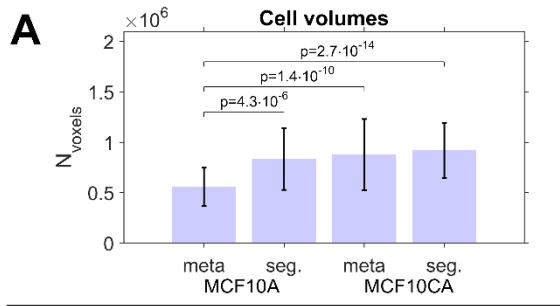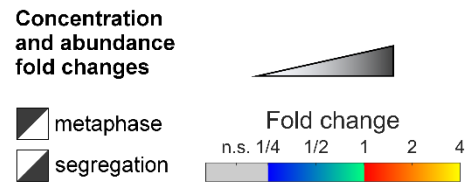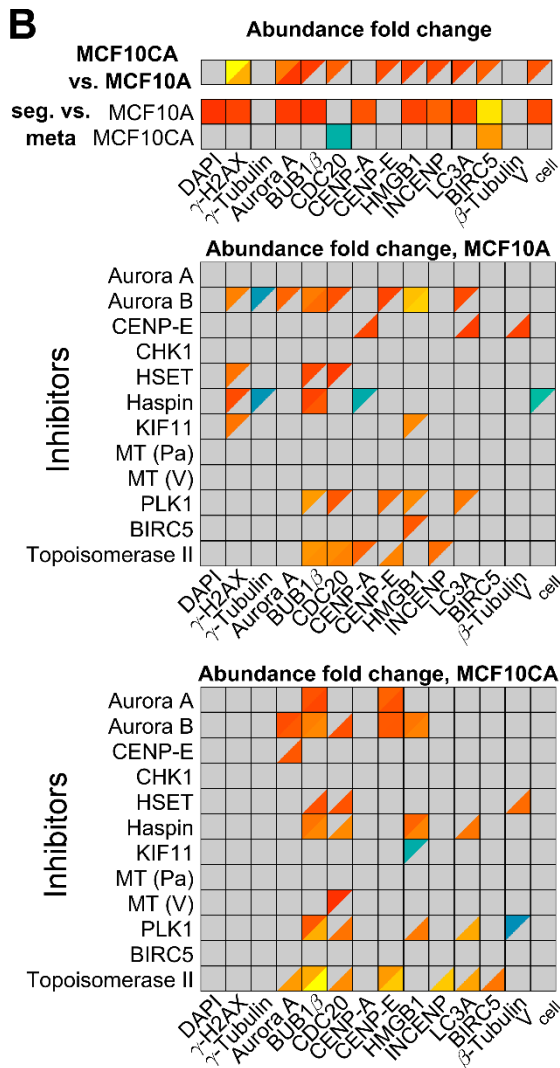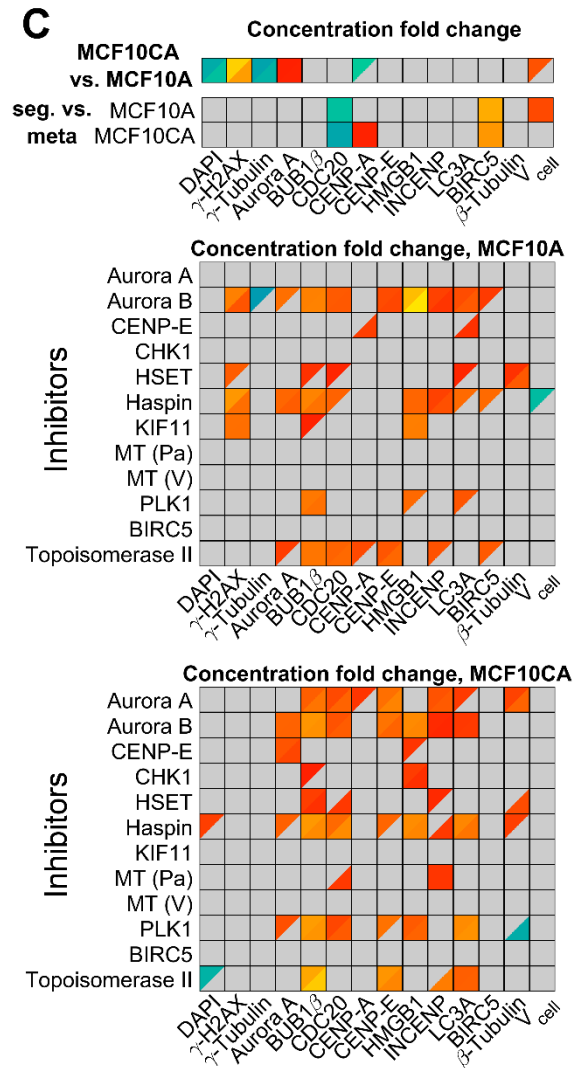

**Appendix Figure S1 - Fold changes in measures of abundance or concentration in single cells.**

**A** Cell volumes of MCF10A and MCF10CA cells during metaphase or segregation. For significant comparisons, p-values are indicated (Welch's t-test followed by Bonferroni correction for 6 tests,  $p < 0.05/6$ ; error bars: standard deviations; seg., segregation).

**B** Fold changes in measures of abundance related to the cell line (top panel, MCF10CA vs. MCF10A), mitotic phase (segregation vs. metaphase) or inhibitor treatments. Effects related

to cell line or inhibitors were indicated separately for metaphase (upper left triangles) and segregation (lower right triangles). All significant effects were visualized (Welch's t-tests performed for 18 ROIs followed by Bonferroni correction for 52 tests in each measured species,  $p < 0.05/52$ ). Only Haspin had slight effects on volume estimates during metaphase. For all other inhibitors, effects on abundance measures were similar to effects on concentration measures. Effects related to abundance measures were less prominent than for concentration measures. This can be explained as a result of multiplying intensities with volume estimates to obtain abundance measures, which increases the influence of cell volume estimates as an error source (MT, microtubule inhibitor; Pa, paclitaxel; V, vinblastine; n. s., not significant).

C      Fold changes in measures of concentration related to the cell line (top panel, MCF10CA vs. MCF10A), mitotic phase (segregation vs. metaphase) or inhibitor treatments as in B (see also Figs 3A and B).

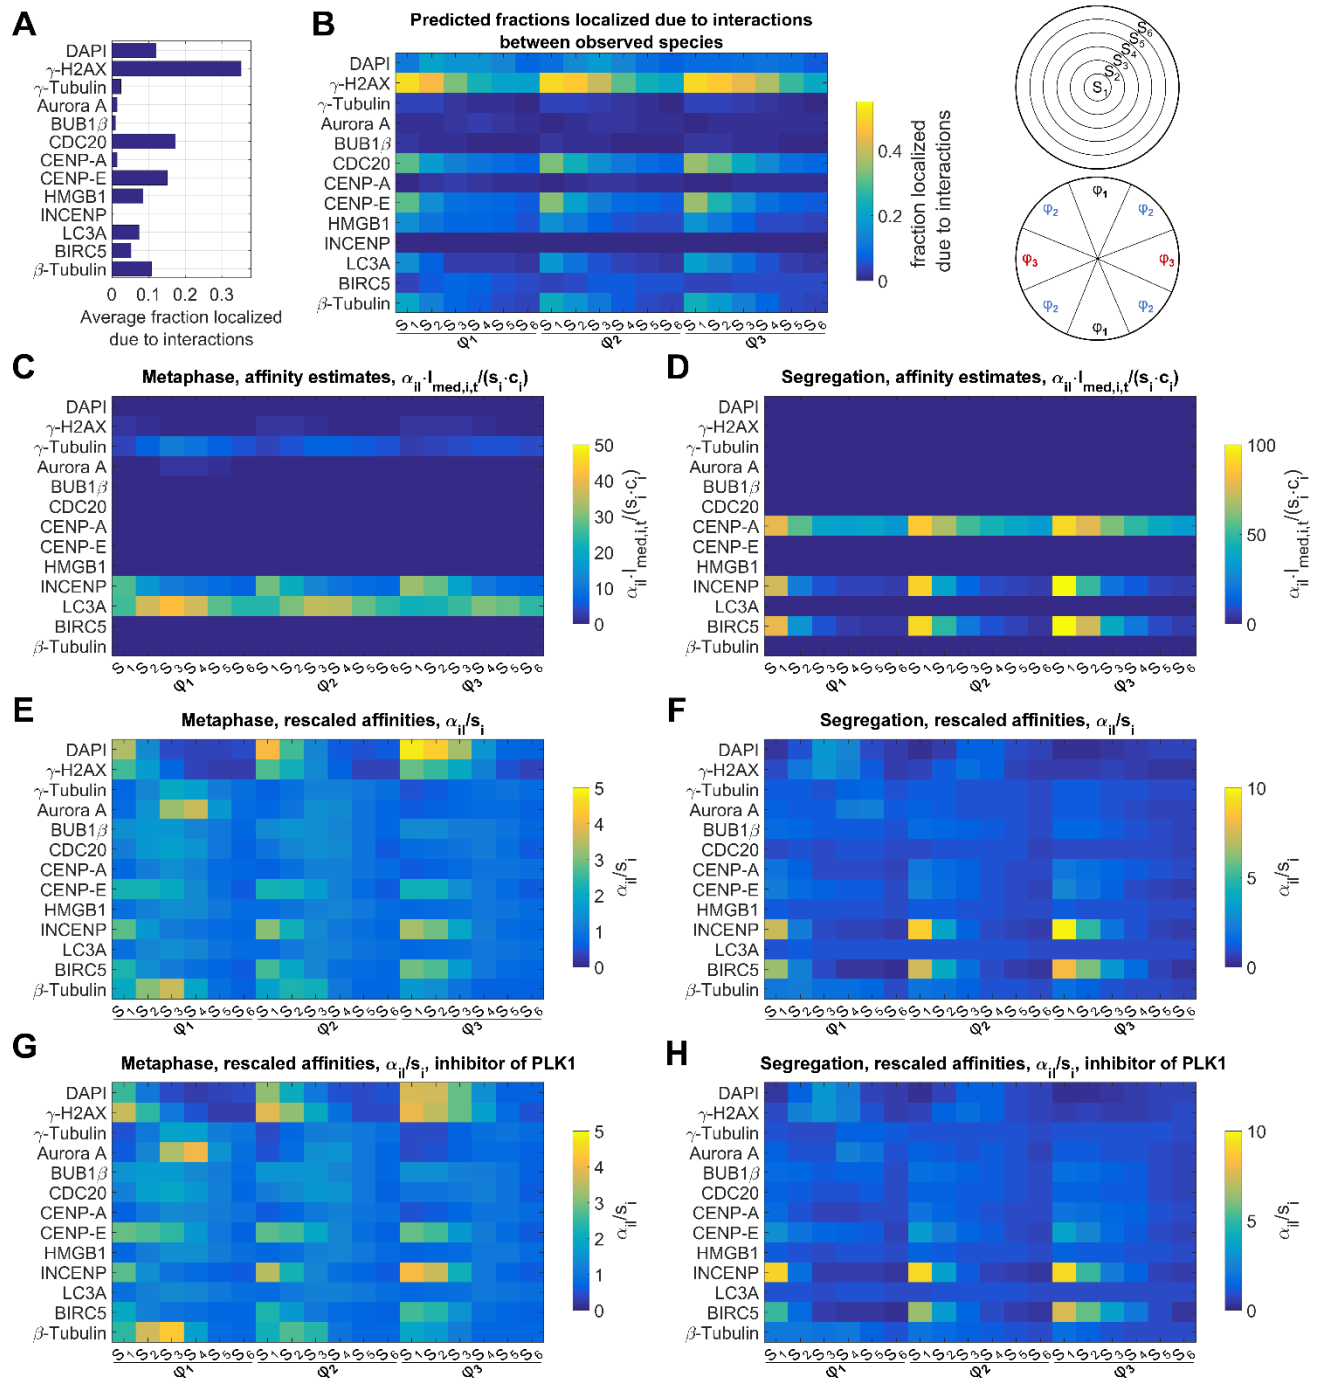

**Appendix Figure S2 - Predicted localization affinities.**

**A** Predicted fractions of proteins recruited to mitotic ROIs due to mutual affinities between proteins.

B Predicted fractions of proteins recruited due to mutual affinities between proteins, distinguished by eccentricity intervals ( $S_1$  to  $S_6$ ) and orientations ( $\varphi_1$  to  $\varphi_3$ ) as indicated by schematic maps.

C, D Affinity estimates  $\tilde{\alpha}_{il} = \alpha_{il} I_{med,i,t} / (s_i c_i)$ , before dividing by scaling factor estimates, during metaphase or segregation obtained by model fitting to dataset from untreated cells (see Appendix Supplementary Methods for details).

E, F Rescaled untreated localization affinities  $\alpha_{il} / s_i$  during metaphase or segregation.

G, H Rescaled localization affinities  $\alpha_{il} / s_i$  upon treatment with PLK1.

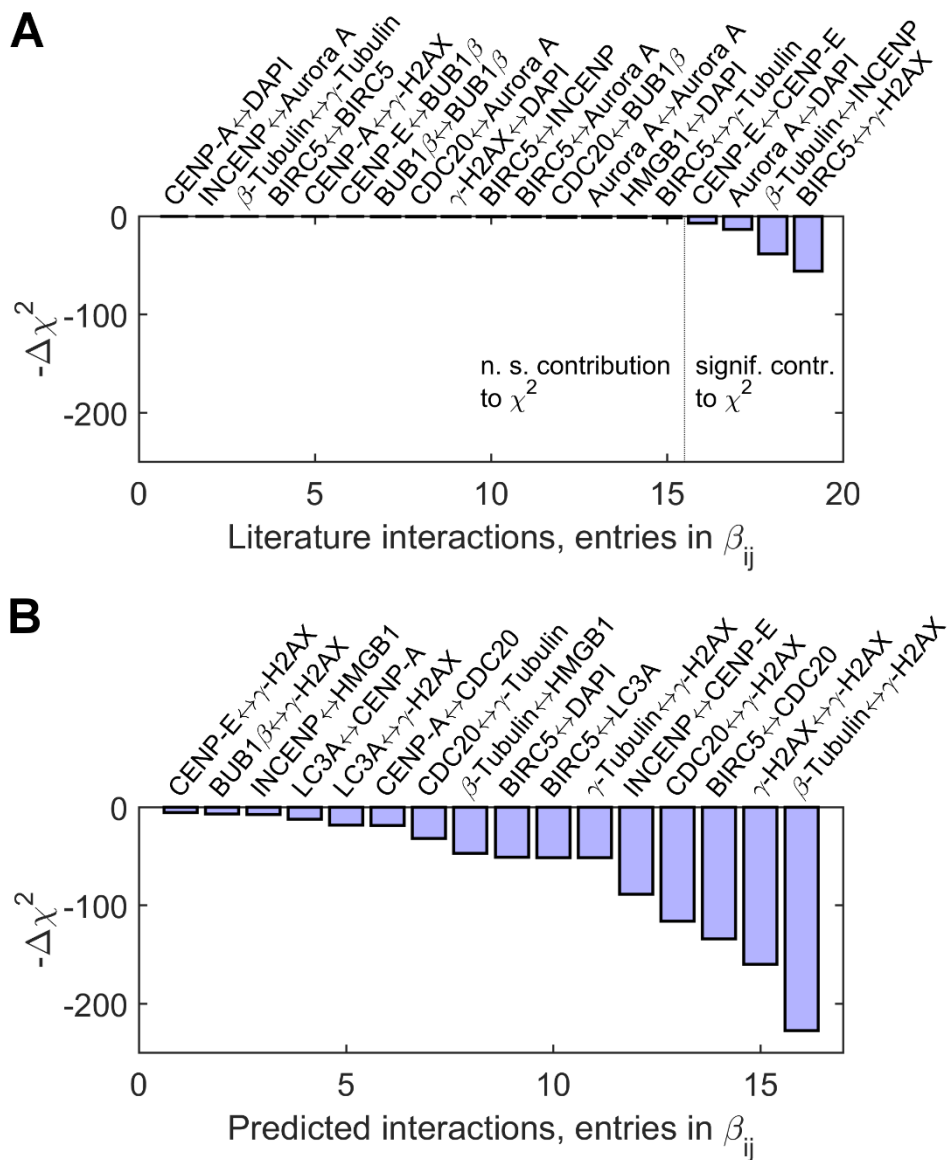

### Appendix Figure S3 - Importance of affinity parameters for model fit.

A Affinity parameters related to literature interactions were withdrawn before refitting the model.  $\Delta\chi^2$  differences between the full model and reduced models are shown. Only four literature interactions significantly contributed to explaining the dataset, based on a 95% confidence interval of a one-dimensional  $\chi^2$  distribution. Of note, the observation that an affinity parameter was not required for the model to explain the data does not imply absence of binding between these species but likely results due to non-identifiability.

B  $\Delta\chi^2$  differences between the full model and reduced models, in which predicted affinities were withdrawn before refitting the model.

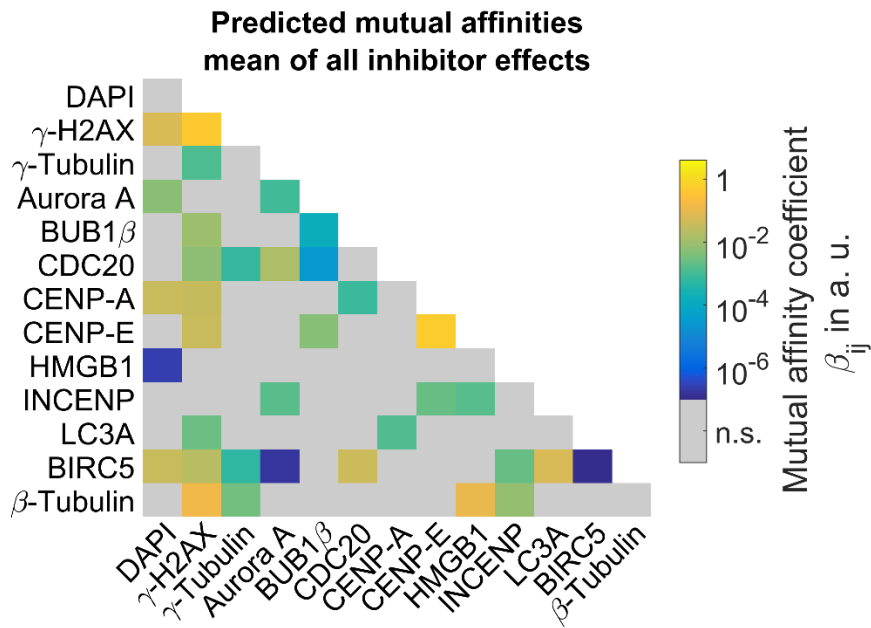

**Appendix Figure S4 - Average mutual affinities of all inhibitor effects.**

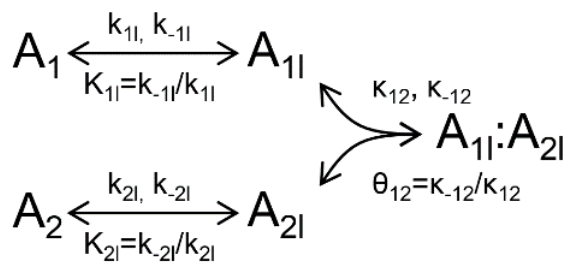

**Appendix Figure S5 – Simple affinity model for two species.**

Binding of species  $A_1$  and  $A_2$  to mitotic ROI  $l$  results in  $A_{1l}$  and  $A_{2l}$ . Mutual binding in this compartment results in  $A_{1l}:A_{2l}$ .

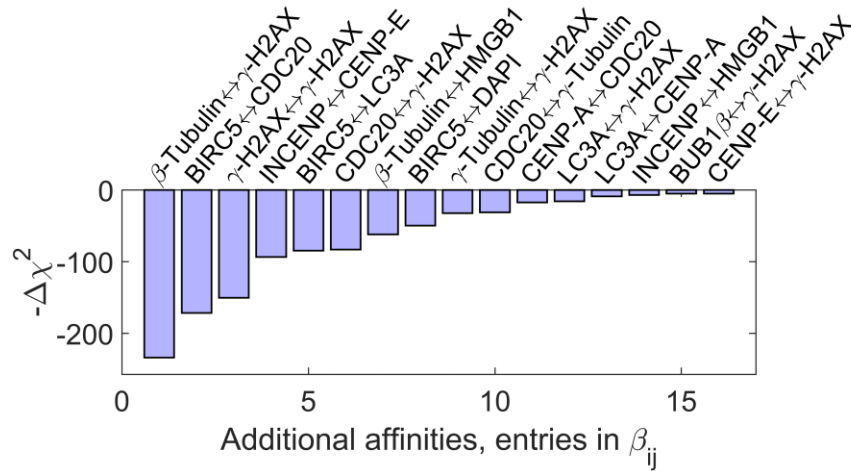

**Appendix Figure S6 – Sequential forward selection of mutual affinities.**

Affinities between proteins included in addition to literature interactions. By sequential forward selection, entries in the matrix  $\beta_{ij}$  that contains mutual affinities between proteins were included in the model if the model fit was significantly improved. All included affinities were ordered according to the improvement in the  $\chi^2$  measure of model deviation from the experimental data.

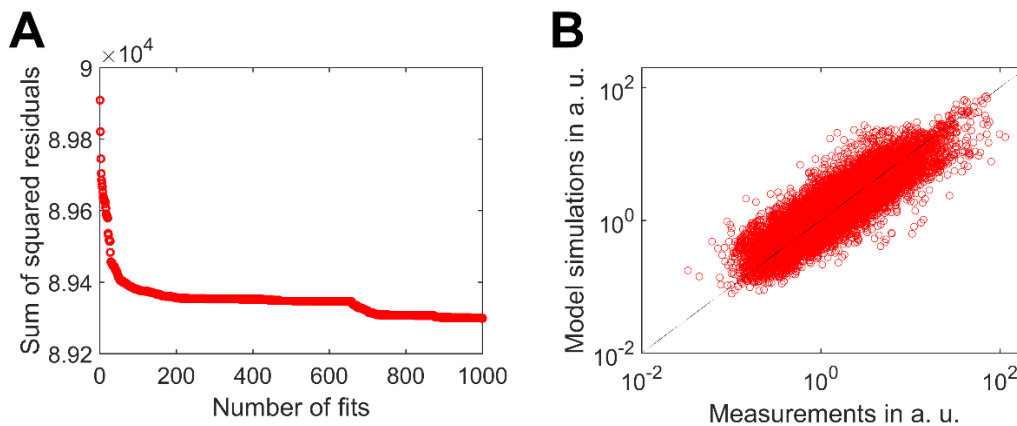

**Appendix Figure S7 - Results of multi-start local optimizations.**

A Ordered sums of squared residuals for 1000 model fits to the control dataset from untreated cells. Differences between best fits were below the range of squared residuals for single data points indicating convergence of model fits towards a global optimum.

B Best-fit model simulations and measurements indicate that the model is consistent with the experimental dataset.



**Appendix Table S1 - Assay proteins, inhibitors and cell lines** (A, antibodies and fluorophores; B, inhibitors and their targets; C, cell lines and their type).

| <b>A</b>          |                         |                    | <b>B</b>         |                         |             |
|-------------------|-------------------------|--------------------|------------------|-------------------------|-------------|
| <b>Antibody</b>   | <b>Alternative name</b> | <b>Fluorophore</b> | <b>Target</b>    | <b>Alternative name</b> | <b>Drug</b> |
| Aurora kinase A   | Aurora A                | Cy3                | Aurora kinase A  | Aurora A                | MK-5108     |
| BUB1 $\beta$      | BUBR1                   | DyLight 650        | Aurora kinase B  | Aurora B                | Barasertib  |
| CDC20             |                         | DyLight 650        | CENP-E           |                         | GSK923295   |
| CENP-A            |                         | DyLight 650        | Chk1             |                         | MK-8776     |
| CENP-E            |                         | DyLight 550        | Haspin           |                         | CHR-6494    |
| H2AX              |                         | DyLight 550        | KIFC1            | HSET                    | CW069       |
| HMGB1             |                         | Cy3                | Kif11            | Eg5                     | Ispinesib   |
| INCENP            |                         | DyLight 650        | Microtubules     |                         | Paclitaxel  |
| MAP1LC3A          | LC3A                    | DyLight 650        | Microtubules     |                         | Vinblastine |
| BIRC5             | Survivin                | Cy3                | PLK1             |                         | GSK461364   |
| $\beta$ -Tubulin  |                         | Cy3                | BIRC5            | Survivin                | YM155       |
| $\gamma$ -Tubulin |                         | DyLight 550        | Topoisomerase II |                         | Etoposide   |

  

| <b>C</b>         |                 |
|------------------|-----------------|
| <b>Cell line</b> | <b>Type</b>     |
| MCF10A           | non-tumorigenic |
| MCF10CA          | tumorigenic     |
